# Supplementary material
Source: PubMed Central journal article supplement (PMC4025603)
Supplement: Supp_Fig4.pdf [file Supp_Fig4.pdf]

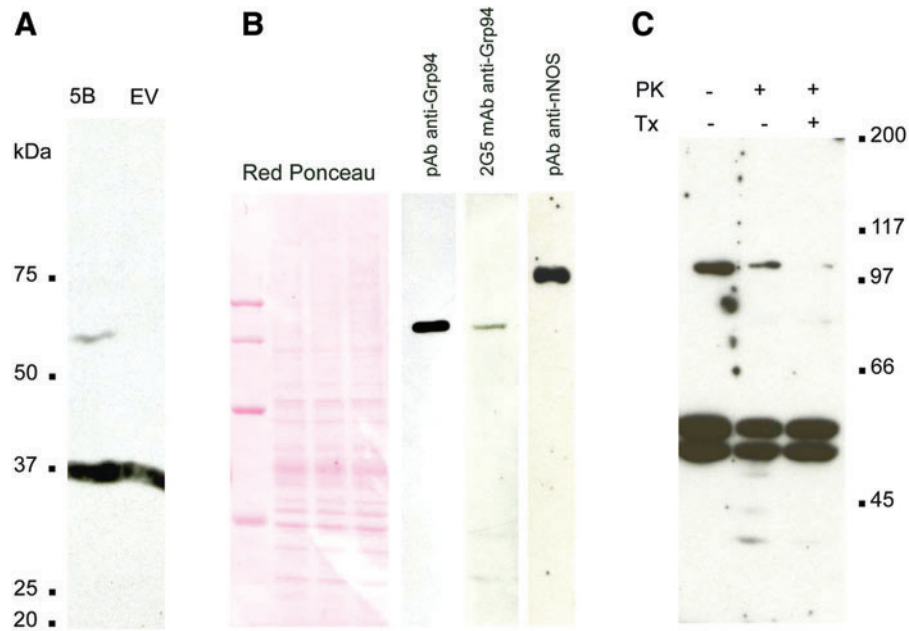

**SUPPLEMENTARY FIG. S4. Western blot analyses.** (A) Western blot analysis of pVSV-G 5B protein product. About 600  $\mu$ l of bacterial lysates from colonies transformed with pVSV-G 5B or the EV were loaded onto the gel. Blot was incubated with the pAb anti-Grp94 antibody SPA851. (B) Specificity of the antibodies used for immunoprecipitation assays. Western blot analyses of antibody immunoreactivity on rat cerebellum lysates. *Left panel* shows the RP stainings of the molecular weight lane ( $M_r$  standards from the top correspond to 117,000; 97,000; 66,000; 45,000 Da) and of those loaded with samples. *Right panels* show the polypeptides recognized by two different Grp94 antibodies and one anti-nNOS antibody. (C) Western blot of a 7.5% acrylamide gel loaded with 40  $\mu$ g of crude membranes fractionated from ambulatory soleus muscles, as described in "Materials and Methods," and exposed or not to 150 ng/ml of PK, in the absence or in the presence of 0.5% Triton-X for 30 min at RT. Nitrocellulose strips were stained for Grp94 using the rat mAb 9G10. EV, empty vector; mAb, monoclonal antibody; nNOS, neuronal nitric oxide synthase; pAb, polyclonal antibody; PK, proteinase K; RT, room temperature.
