# Supplementary material
Source: PubMed Central journal article supplement (PMC4025603)
Supplement: Supp_Fig5.pdf [file Supp_Fig5.pdf]

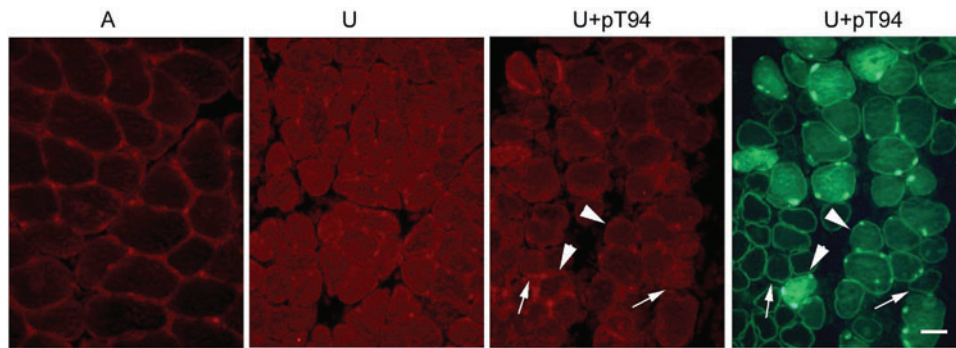

**SUPPLEMENTARY FIG. S5. Effect of recombinant Grp94 expression on ubiquitin immunofluorescence in unloaded soleus muscles.** Bar: 25  $\mu\text{m}$ . Ubiquitin immunoreactivity and Grp94 transfection. Indirect immunofluorescence staining of representative transverse cryosections of ambulatory and unloaded soleus muscles, in the presence and in the absence of pT94-transfection, with anti-ubiquitin antibodies (red fluorescence) and anti- $\alpha$ -sarcoglycan antibody (sarcolemmal green fluorescence). Sarcoplasmic green fluorescence corresponds to GFP and identifies transfected myofibers. *Arrows* indicate representative positive ubiquitin immunoreactivity in unloaded untransfected myofibers. *Arrowheads* point to transfected myofibers showing apparently absent ubiquitin immunofluorescence.
